# Supplementary material for: Somatostatin Receptor Splicing Variant sst5TMD4 Overexpression in Glioblastoma Is Associated with Poor Survival, Increased Aggressiveness Features, and Somatostatin Analogs Resistance
Source: MDPI journal article supplement (doi:10.3390/ijms23031143), 2022-01-20
Supplement: s1 [file s1]

Supplemental Figure S1

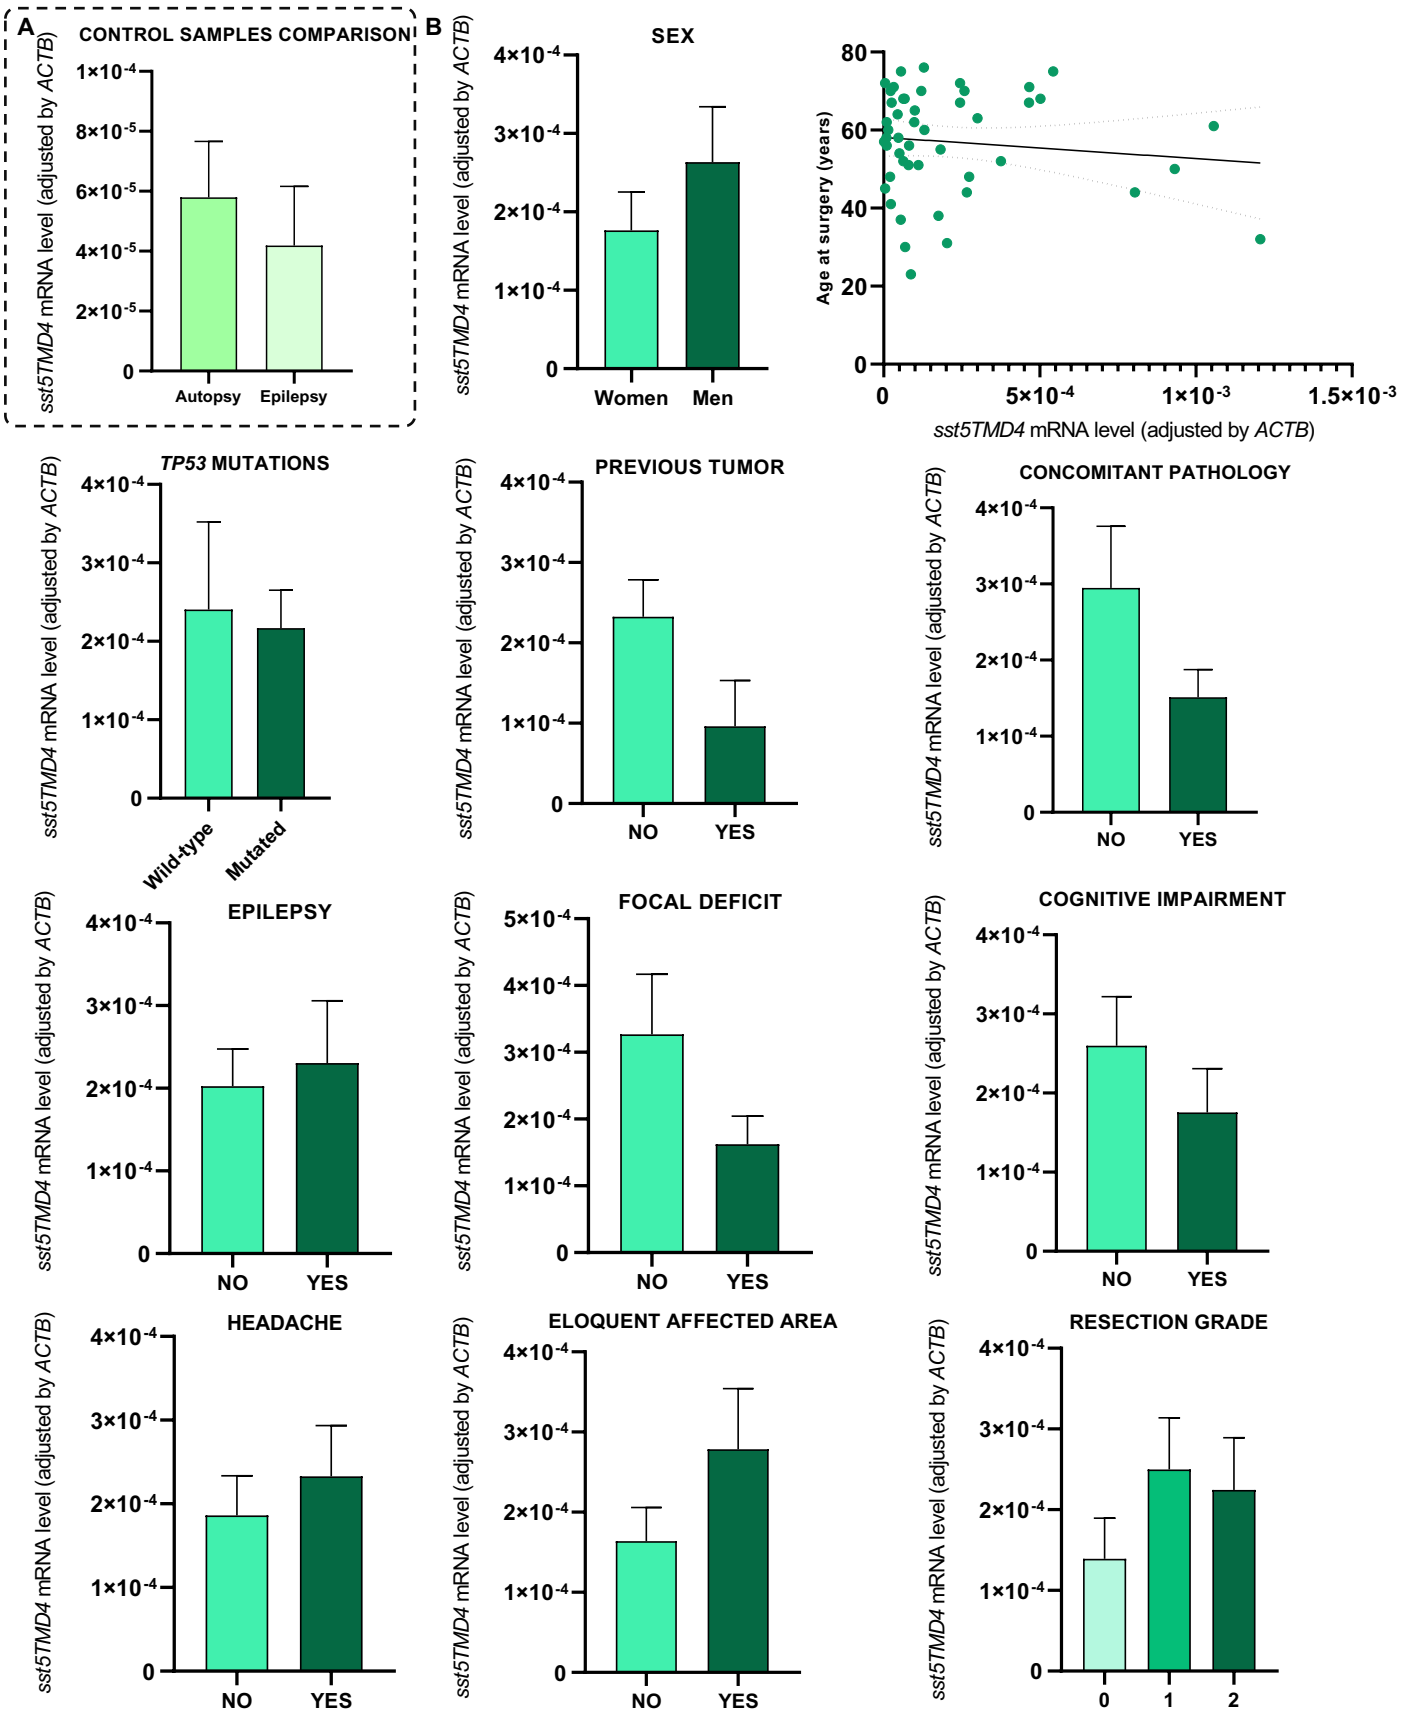

Supplemental Figure S1. Comparison of *sst5TMD4* mRNA expression between two different control sample groups (first figure, left top corner) and relation between *sst5TMD4* mRNA levels and different clinical factors in glioblastoma patients (other figures). Non-tumor control brains were obtained from autopsies or epileptic patients (lobectomy). Clinical parameters measured in GBM samples were *TP53* mutations, age, sex, previous tumors, concomitant pathologies, epilepsy, focal deficit, cognitive impairment, headache, eloquent affected area, and resection grade.

Supplemental Figure S2

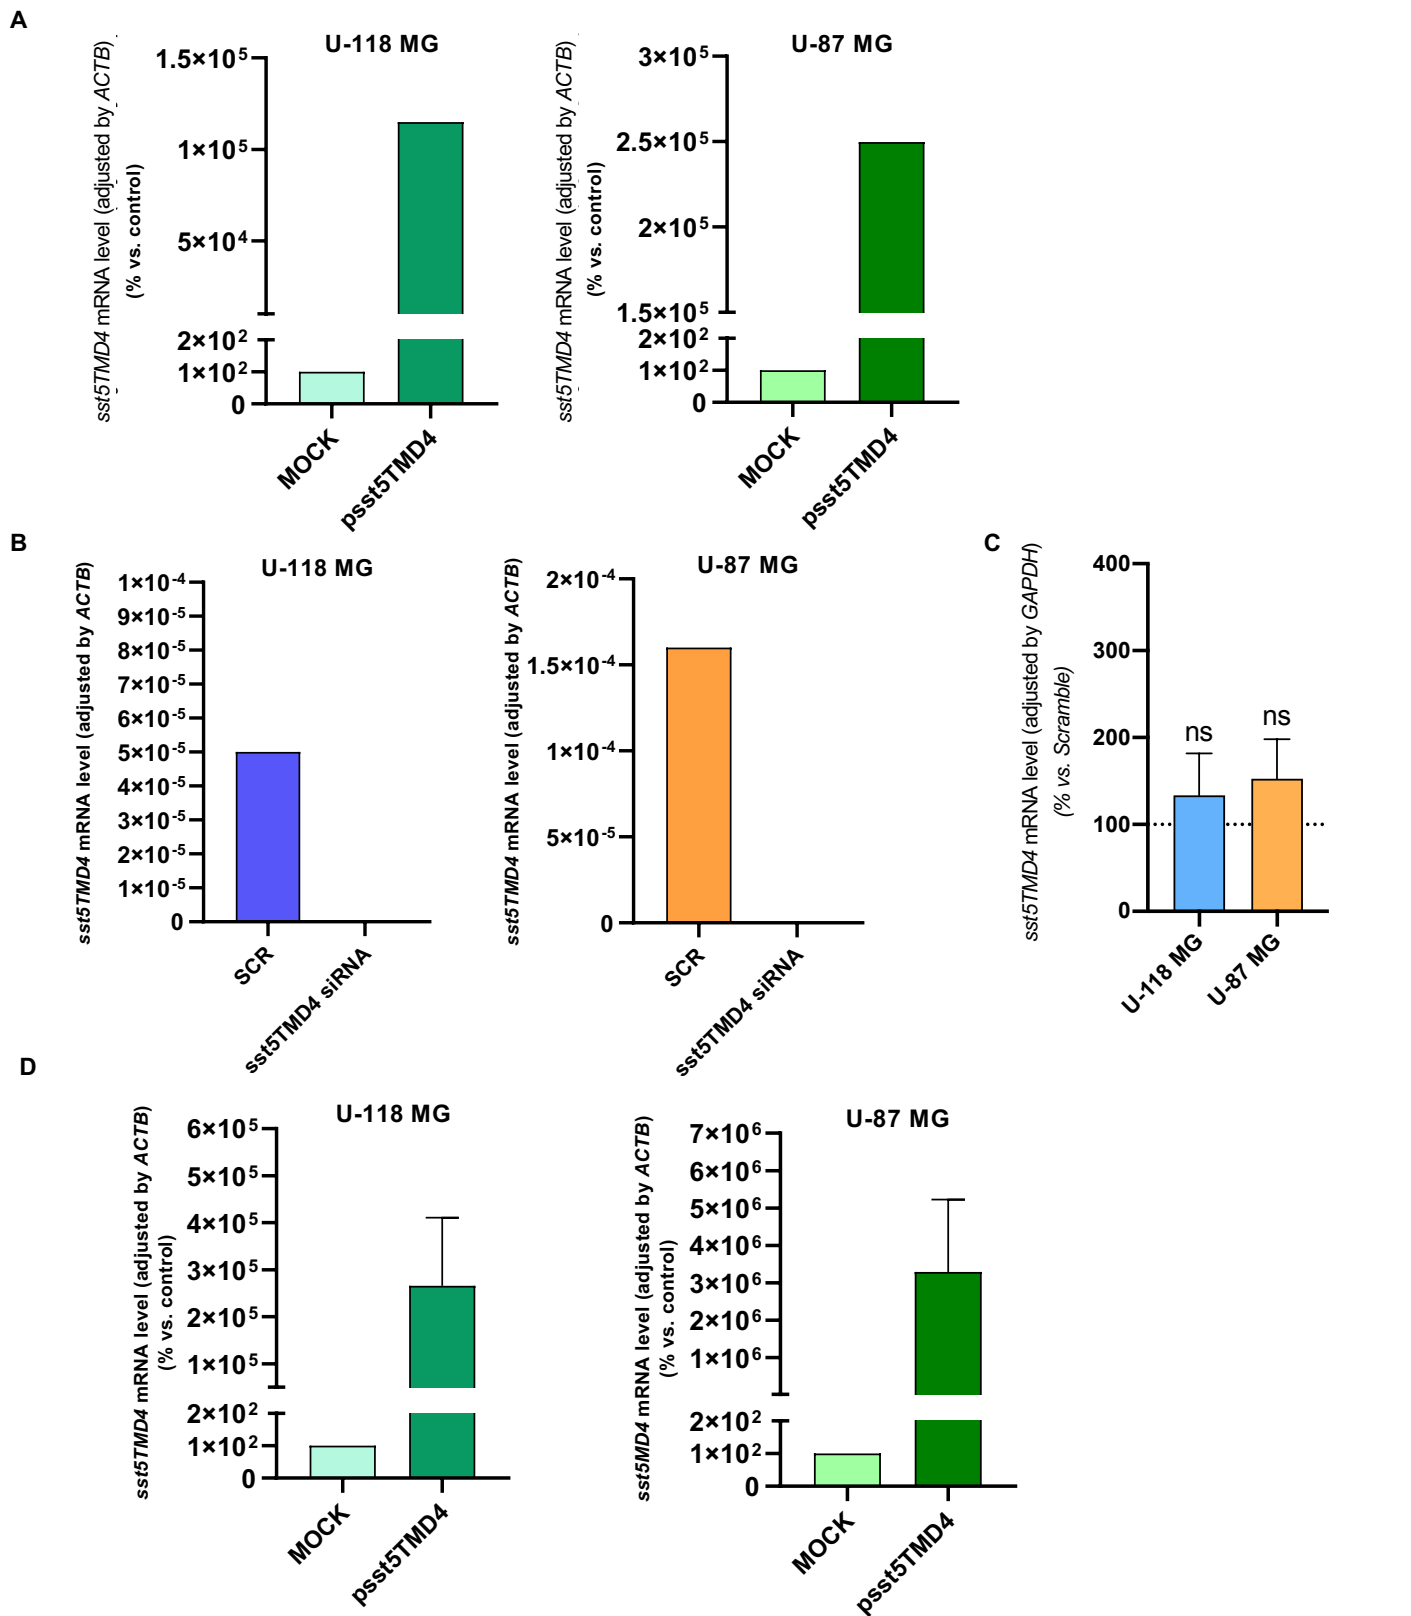

Supplemental Figure S2. Validation of the modulation of *sst5TMD4* expression in U-87 MG and U-118 MG cell lines. (A) Validation of stable overexpression of *sst5TMD4* in cells used for the functional assays. (B) Validation of transient silencing of *sst5TMD4* in cells used for the functional assays and (C) validation of the possible off-target *SSTR5* mRNA expression. (D) Validation of transient overexpression of *sst5TMD4* in cells used for the functional assays for the signaling assay (phosphorylation array).

# Supplemental Table S1

**Supplemental Table S1.** Specific primers for human transcripts used in this study [including the two housekeeping genes (HK)] were specifically designed for quantitative real-time PCR. The official name of the genes, NCBI accession number of the transcripts, primers sequences, and product sizes of the amplification products are included.

|             | Gene            | Genbank<br>Accession<br>number        | Sense sequence        | Antisense sequence     | Amplicon<br>size (pb) |
|-------------|-----------------|---------------------------------------|-----------------------|------------------------|-----------------------|
| HKs         | <i>ACTB</i>     | NM0011101                             | ACTCTTCCAGCCTTCCTTCCT | CAGTGATCTCCTTCTGCATCCT | 176                   |
|             | <i>GAPDH</i>    | NM_001256799                          | AATCCCATCACCATCTTCCA  | AAATGAGCCCCAGCCTTC     | 122                   |
| SSTR FAMILY | <i>SSTR1</i>    | NM_001049                             | CACATTCTCATGGGCTTCCT  | ACAAACACCATCACCACCATC  | 165                   |
|             | <i>SSTR2</i>    | NM_001050                             | GGCATGTTTGACTTTGTGGTG | GTCTCATTGAGCCGGGATTT   | 185                   |
|             | <i>SSTR3</i>    | NM_001051                             | TGCCTTCTTTGGGCTCTACTT | ATCCTCCTCCTCAGTCTTCTCC | 190                   |
|             | <i>SSTR4</i>    | NM_001052                             | TCTTTGTGCTCTGCTGGATG  | GGATAAGGGACACGTGGTTG   | 174                   |
|             | <i>SSTR5</i>    | NM_001053                             | CTGGTGTTGCGGGATGTT    | GAAGCTCTGGCGGAAGTTGT   | 183                   |
|             | <i>sst5TMD4</i> | DQ448304 (only<br>uniprot annotation) | TACCTGCAACCGTCTGCC    | AGCCTGGGCCTTTCTCCT     | 98                    |
|             |                 |                                       |                       |                        |                       |
